# Supplementary material for: Plant Photocatalysts: Photoinduced Oxidation and Reduction Abilities of Plant Leaf Ashes under Solar Light
Source: MDPI journal article supplement (doi:10.3390/nano13152260), 2023-08-06
Supplement: s1 [file s1]

## Supporting Information

### **Plant Photocatalysts: Photoinduced Oxidation and Reduction Abilities of Plant Leaf Ashes under Solar Light**

Xiaoqian Ma <sup>1,†</sup>, Jiao He <sup>1,†</sup>, Yu Liu <sup>2</sup>, Xiaoli Bai <sup>1</sup>, Junyang Leng <sup>1</sup>, Yi Zhao <sup>1</sup>, Daomei Chen <sup>2,\*</sup> and Jiaqiang Wang <sup>1,2,\*</sup>

<sup>1</sup> School of Chemical Sciences & Technology, Yunnan University, Kunming 650091, China; 18290855825@163.com (X.M.); hejiao@ynu.edu.cn (J.H.); m18213412529@163.com (X.B.); ljj262@163.com (J.L.); m18788591505@163.com (Y.Z.)

<sup>2</sup> School of Materials and Energy, Yunnan University, Kunming 650091, China; liuyu19990204@163.com

\* Correspondence: dmchen@ynu.edu.cn (D.C.); jqwang@ynu.edu.cn (J.W.); Fax: +86-871-65031567

<sup>†</sup> These authors contributed equally to this work.

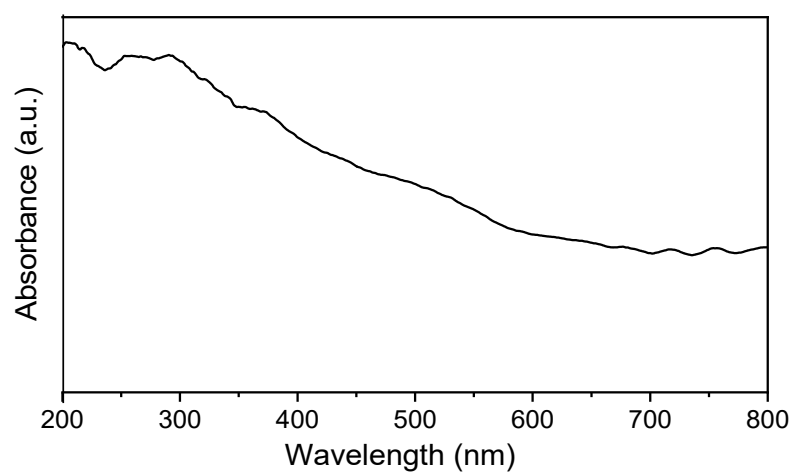

**Figure S1.** UV-vis diffuse reflectance spectra of couchgrass ash.

**Table S1** Comparison of the main elements content of the garlic sprouts (stem) determined by XRF and XPS.

| Name                      | The main element content (mass %) |       |       |       |       |      |      |      |
|---------------------------|-----------------------------------|-------|-------|-------|-------|------|------|------|
|                           | K                                 | Cl    | O     | Ca    | C     | Mg   | Si   | B    |
| XRF-garlic sprouts (stem) | 27.64                             | 22.70 | 28.06 | 6.77  | 6.24  | 1.85 | 0.23 | 2.11 |
| XPS-garlic sprouts (stem) | 2.34                              | 0.61  | 54.05 | 10.93 | 22.86 | 5.78 | 4.36 | 2.27 |

**Table S2** Summary of textural properties of three plant ashes.

| Samples               | $S_{\text{BET}}(\text{m}^2\text{g}^{-1})$ | Pore volume( $\text{cm}^3\text{g}^{-1}$ ) | Pore size(nm) |
|-----------------------|-------------------------------------------|-------------------------------------------|---------------|
| garlic sprouts (leaf) | 5.82                                      | 0.0097                                    | 41.52         |
| Chinese leek (leaf)   | 3.62                                      | 0.0048                                    | 36.08         |
| garlic sprouts (stem) | 3.69                                      | 0.0054                                    | 34.61         |
| Chinese leek (stem)   | 1.51                                      | 0.0024                                    | 20.69         |

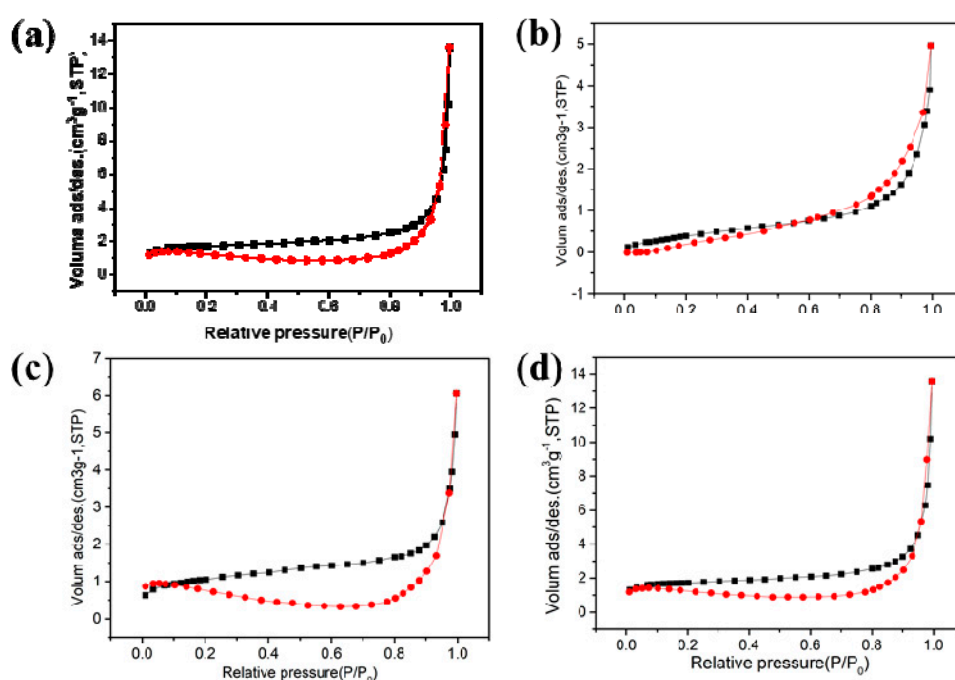

**Figure S2** N<sub>2</sub> adsorption/desorption isotherm distribution of garlic sprouts (leaf) ash(a), Chinese leek (leaf)(b), garlic sprouts (root) ash(c) and Chinese leek (stem)(d).
